# Supplementary material for: Reliability Estimation of XLindley Constant-Stress Partially Accelerated Life Tests using Progressively Censored Samples
Source: MDPI journal article supplement (doi:10.3390/math11061331), 2023-03-09
Supplement: s1 [file s1]

## Supplementary Materials

### Reliability Estimation of XLindley Constant-Stress Partially Accelerated Life Tests using Progressively Censored Samples

Mazen Nassar<sup>1,2</sup>, Refah Alotaibi<sup>3</sup>, and Ahmed Elshahhat<sup>4\*</sup>

<sup>1</sup>Faculty of Science, King Abdulaziz University, Jeddah 21589, Saudi Arabia

<sup>2</sup>Department of Statistics, Faculty of Commerce, Zagazig University, Zagazig 44519, Egypt

<sup>3</sup>Department of Mathematical Sciences, College of Science, Princess Nourah bint Abdulrahman University, P.O. Box 84428, Riyadh 11671, Saudi Arabia

<sup>4</sup>Faculty of Technology and Development, Zagazig University, Zagazig 44519, Egypt

---

\*Email: aelshahhat@ftd.zu.edu.eg

Table S1: Average estimates (1st column), RMSEs (2nd column) and MRABs (3rd column) of  $\beta$ .

| Set ↓<br>Prior → | $n$ | $m$ | Scheme | MLE    |        |        |        | MCMC   |        |        |        |        |
|------------------|-----|-----|--------|--------|--------|--------|--------|--------|--------|--------|--------|--------|
|                  |     |     |        |        |        |        |        | 1      |        | 2      |        |        |
| 1                | 40  | 20  | 1      | 0.3241 | 0.1806 | 0.3517 | 0.3576 | 0.1461 | 0.2849 | 0.3660 | 0.1379 | 0.2681 |
|                  |     |     | 2      | 0.3273 | 0.1771 | 0.3455 | 0.3609 | 0.1426 | 0.2781 | 0.3701 | 0.1337 | 0.2597 |
|                  |     |     | 3      | 0.3279 | 0.1758 | 0.3442 | 0.3603 | 0.1431 | 0.2795 | 0.3616 | 0.1416 | 0.2718 |
|                  |     | 30  | 1      | 0.3377 | 0.1669 | 0.3247 | 0.3672 | 0.1404 | 0.2664 | 0.3680 | 0.1347 | 0.2541 |
|                  |     |     | 2      | 0.3578 | 0.1482 | 0.2845 | 0.3710 | 0.1365 | 0.2588 | 0.3844 | 0.1239 | 0.2312 |
|                  |     |     | 3      | 0.3565 | 0.1490 | 0.2869 | 0.3639 | 0.1424 | 0.2726 | 0.3817 | 0.1260 | 0.2367 |
|                  | 80  | 40  | 1      | 0.3968 | 0.1074 | 0.2065 | 0.4366 | 0.0692 | 0.1260 | 0.4615 | 0.0655 | 0.0363 |
|                  |     |     | 2      | 0.3975 | 0.1066 | 0.2050 | 0.4366 | 0.0692 | 0.1237 | 0.4623 | 0.0665 | 0.0368 |
|                  |     |     | 3      | 0.3944 | 0.1092 | 0.2112 | 0.4332 | 0.0725 | 0.1304 | 0.4504 | 0.0686 | 0.0383 |
|                  |     | 60  | 1      | 0.4403 | 0.0747 | 0.1267 | 0.4472 | 0.0632 | 0.1100 | 0.4606 | 0.0407 | 0.0215 |
|                  |     |     | 2      | 0.4415 | 0.0737 | 0.1267 | 0.4487 | 0.0616 | 0.1068 | 0.4614 | 0.0419 | 0.0222 |
|                  |     |     | 3      | 0.4367 | 0.0764 | 0.1335 | 0.4422 | 0.0667 | 0.1179 | 0.4484 | 0.0431 | 0.0230 |
| 2                | 40  | 20  | 1      | 1.0241 | 0.4952 | 0.3177 | 1.0526 | 0.4593 | 0.2983 | 1.2928 | 0.2321 | 0.1381 |
|                  |     |     | 2      | 1.0270 | 0.4921 | 0.3158 | 1.0561 | 0.4556 | 0.2959 | 1.2914 | 0.2335 | 0.1391 |
|                  |     |     | 3      | 1.0199 | 0.4979 | 0.3204 | 1.0468 | 0.4644 | 0.3022 | 1.2866 | 0.2385 | 0.1423 |
|                  |     | 30  | 1      | 1.0157 | 0.4939 | 0.3229 | 1.1044 | 0.4121 | 0.2637 | 1.3445 | 0.1757 | 0.1037 |
|                  |     |     | 2      | 1.0188 | 0.4906 | 0.3208 | 1.1037 | 0.4124 | 0.2642 | 1.3445 | 0.1757 | 0.1037 |
|                  |     |     | 3      | 1.0087 | 0.5005 | 0.3275 | 1.1020 | 0.4138 | 0.2653 | 1.3429 | 0.1775 | 0.1047 |
|                  | 80  | 40  | 1      | 1.2853 | 0.2742 | 0.1590 | 1.2840 | 0.2358 | 0.1445 | 1.4465 | 0.0676 | 0.1120 |
|                  |     |     | 2      | 1.2855 | 0.2737 | 0.1588 | 1.2850 | 0.2348 | 0.1438 | 1.4458 | 0.0667 | 0.1105 |
|                  |     |     | 3      | 1.2694 | 0.2845 | 0.1667 | 1.2723 | 0.2457 | 0.1520 | 1.4433 | 0.0689 | 0.1118 |
|                  |     | 60  | 1      | 1.2765 | 0.2542 | 0.1529 | 1.3001 | 0.2242 | 0.1333 | 1.4723 | 0.0561 | 0.0954 |
|                  |     |     | 2      | 1.2768 | 0.2537 | 0.1527 | 1.3021 | 0.2228 | 0.1319 | 1.4707 | 0.0553 | 0.0938 |
|                  |     |     | 3      | 1.2580 | 0.2693 | 0.1638 | 1.2942 | 0.2291 | 0.1372 | 1.4692 | 0.0638 | 0.1103 |

Table S2: Average estimates (1st column), RMSEs (2nd column) and MRABs (3rd column) of  $\delta$ .

| Set ↓<br>Prior → | $n$ | $m$ | Scheme | MLE    |        |        |        | MCMC   |        |        |        |        |
|------------------|-----|-----|--------|--------|--------|--------|--------|--------|--------|--------|--------|--------|
|                  |     |     |        |        |        |        |        | 1      | 2      |        |        |        |
| 1                | 40  | 20  | 1      | 1.4979 | 0.3669 | 0.1948 | 1.2083 | 0.3218 | 0.1933 | 1.6180 | 0.1317 | 0.0789 |
|                  |     |     | 2      | 1.4169 | 0.3534 | 0.1946 | 1.2126 | 0.3184 | 0.1918 | 1.4793 | 0.0635 | 0.0331 |
|                  |     |     | 3      | 1.4254 | 0.3555 | 0.1938 | 1.2211 | 0.3120 | 0.1861 | 1.4771 | 0.0633 | 0.0321 |
|                  |     | 30  | 1      | 1.3717 | 0.3484 | 0.1938 | 1.2176 | 0.3166 | 0.1895 | 1.4882 | 0.0599 | 0.0329 |
|                  |     |     | 2      | 1.3695 | 0.3476 | 0.1918 | 1.2184 | 0.3153 | 0.1881 | 1.4882 | 0.0592 | 0.0323 |
|                  |     |     | 3      | 1.4277 | 0.3445 | 0.1883 | 1.2251 | 0.3106 | 0.1836 | 1.4930 | 0.0578 | 0.0324 |
|                  | 80  | 40  | 1      | 1.3243 | 0.2766 | 0.1549 | 1.2734 | 0.2805 | 0.1580 | 1.4668 | 0.0453 | 0.0257 |
|                  |     |     | 2      | 1.3265 | 0.2760 | 0.1543 | 1.2932 | 0.2663 | 0.1492 | 1.4668 | 0.0433 | 0.0237 |
|                  |     |     | 3      | 1.3852 | 0.2547 | 0.1395 | 1.2958 | 0.2612 | 0.1462 | 1.4687 | 0.0420 | 0.0228 |
|                  |     | 60  | 1      | 1.3657 | 0.2666 | 0.1472 | 1.2895 | 0.2674 | 0.1499 | 1.4717 | 0.0397 | 0.0216 |
|                  |     |     | 2      | 1.3748 | 0.2646 | 0.1458 | 1.2989 | 0.2645 | 0.1475 | 1.4743 | 0.0378 | 0.0206 |
|                  |     |     | 3      | 1.4545 | 0.2529 | 0.1357 | 1.4051 | 0.2613 | 0.1451 | 1.4767 | 0.0353 | 0.0191 |
| 2                | 40  | 20  | 1      | 2.5633 | 0.6127 | 0.1925 | 2.2391 | 0.3051 | 0.1047 | 2.4959 | 0.0542 | 0.0183 |
|                  |     |     | 2      | 2.5204 | 0.6061 | 0.1922 | 2.2351 | 0.3092 | 0.1064 | 2.4958 | 0.0543 | 0.0184 |
|                  |     |     | 3      | 2.5160 | 0.6022 | 0.1912 | 2.2548 | 0.2917 | 0.0989 | 2.4950 | 0.0538 | 0.0180 |
|                  |     | 30  | 1      | 2.5296 | 0.5897 | 0.1873 | 2.2474 | 0.2957 | 0.1017 | 2.5020 | 0.0509 | 0.0176 |
|                  |     |     | 2      | 2.4826 | 0.5782 | 0.1855 | 2.2511 | 0.2920 | 0.1002 | 2.5024 | 0.0508 | 0.0176 |
|                  |     |     | 3      | 2.4826 | 0.5775 | 0.1853 | 2.2588 | 0.2852 | 0.0971 | 2.5021 | 0.0510 | 0.0176 |
|                  | 80  | 40  | 1      | 2.5029 | 0.4157 | 0.1319 | 2.3392 | 0.2350 | 0.0762 | 2.4766 | 0.0364 | 0.0116 |
|                  |     |     | 2      | 2.4474 | 0.4136 | 0.1326 | 2.3407 | 0.2343 | 0.0756 | 2.4764 | 0.0365 | 0.0117 |
|                  |     |     | 3      | 2.4433 | 0.4115 | 0.1320 | 2.3429 | 0.2293 | 0.0743 | 2.4767 | 0.0365 | 0.0116 |
|                  |     | 60  | 1      | 2.4130 | 0.3999 | 0.1287 | 2.3423 | 0.2316 | 0.0748 | 2.4831 | 0.0324 | 0.0106 |
|                  |     |     | 2      | 2.4130 | 0.3994 | 0.1285 | 2.3428 | 0.2297 | 0.0743 | 2.4831 | 0.0324 | 0.0106 |
|                  |     |     | 3      | 2.4666 | 0.4009 | 0.1275 | 2.3499 | 0.2232 | 0.0723 | 2.4827 | 0.0326 | 0.0107 |

Table S3: Average estimates (1st column), RMSEs (2nd column) and MRABs (3rd column) of  $R_1(t)$ .

| Set ↓<br>Prior → | $n$ | $m$ | Scheme | MLE    |        |        |        | MCMC   |        |        |        |        |
|------------------|-----|-----|--------|--------|--------|--------|--------|--------|--------|--------|--------|--------|
|                  |     |     |        |        |        |        |        | 1      |        | 2      |        |        |
| 1                | 40  | 20  | 1      | 0.9287 | 0.0650 | 0.0732 | 0.9241 | 0.0603 | 0.0679 | 0.9173 | 0.0532 | 0.0600 |
|                  |     |     | 2      | 0.9275 | 0.0634 | 0.0718 | 0.9171 | 0.0538 | 0.0598 | 0.9161 | 0.0520 | 0.0587 |
|                  |     |     | 3      | 0.9277 | 0.0638 | 0.0721 | 0.9175 | 0.0541 | 0.0603 | 0.9163 | 0.0521 | 0.0589 |
|                  |     | 30  | 1      | 0.9138 | 0.0510 | 0.0561 | 0.9143 | 0.0503 | 0.0566 | 0.9137 | 0.0493 | 0.0558 |
|                  |     |     | 2      | 0.9124 | 0.0497 | 0.0546 | 0.9128 | 0.0488 | 0.0549 | 0.9077 | 0.0452 | 0.0489 |
|                  |     |     | 3      | 0.9149 | 0.0518 | 0.0574 | 0.9159 | 0.0516 | 0.0584 | 0.9087 | 0.0460 | 0.0501 |
|                  | 80  | 40  | 1      | 0.9034 | 0.0395 | 0.0439 | 0.8874 | 0.0275 | 0.0269 | 0.5439 | 0.0182 | 0.0286 |
|                  |     |     | 2      | 0.9031 | 0.0392 | 0.0436 | 0.8870 | 0.0272 | 0.0265 | 0.5441 | 0.0185 | 0.0289 |
|                  |     |     | 3      | 0.9042 | 0.0402 | 0.0449 | 0.8887 | 0.0282 | 0.0279 | 0.5448 | 0.0191 | 0.0301 |
|                  |     | 60  | 1      | 0.8898 | 0.0259 | 0.0277 | 0.8849 | 0.0234 | 0.0236 | 0.5367 | 0.0112 | 0.0168 |
|                  |     |     | 2      | 0.8888 | 0.0256 | 0.0272 | 0.8844 | 0.0228 | 0.0229 | 0.5371 | 0.0116 | 0.0174 |
|                  |     |     | 3      | 0.8901 | 0.0268 | 0.0286 | 0.8868 | 0.0247 | 0.0253 | 0.5376 | 0.0119 | 0.0180 |
| 2                | 40  | 20  | 1      | 0.6754 | 0.1533 | 0.2809 | 0.6653 | 0.1404 | 0.2576 | 0.5891 | 0.0678 | 0.1135 |
|                  |     |     | 2      | 0.6744 | 0.1522 | 0.2788 | 0.6641 | 0.1391 | 0.2553 | 0.5895 | 0.0682 | 0.1144 |
|                  |     |     | 3      | 0.6767 | 0.1549 | 0.2852 | 0.6672 | 0.1420 | 0.2612 | 0.5910 | 0.0698 | 0.1171 |
|                  |     | 30  | 1      | 0.6776 | 0.1521 | 0.2770 | 0.6486 | 0.1251 | 0.2260 | 0.5735 | 0.0505 | 0.0840 |
|                  |     |     | 2      | 0.6766 | 0.1510 | 0.2751 | 0.6484 | 0.1250 | 0.2256 | 0.5735 | 0.0505 | 0.0840 |
|                  |     |     | 3      | 0.6800 | 0.1541 | 0.2794 | 0.6491 | 0.1255 | 0.2270 | 0.5739 | 0.0510 | 0.0849 |
|                  | 80  | 40  | 1      | 0.5926 | 0.0811 | 0.1318 | 0.5916 | 0.0686 | 0.1186 | 0.8795 | 0.0250 | 0.0240 |
|                  |     |     | 2      | 0.5925 | 0.0809 | 0.1316 | 0.5913 | 0.0683 | 0.1181 | 0.8793 | 0.0247 | 0.0237 |
|                  |     |     | 3      | 0.5973 | 0.0844 | 0.1386 | 0.5951 | 0.0716 | 0.1251 | 0.8837 | 0.0267 | 0.0261 |
|                  |     | 60  | 1      | 0.5943 | 0.0746 | 0.1262 | 0.5869 | 0.0654 | 0.1093 | 0.8800 | 0.0208 | 0.0205 |
|                  |     |     | 2      | 0.5942 | 0.0745 | 0.1260 | 0.5863 | 0.0649 | 0.1082 | 0.8796 | 0.0205 | 0.0202 |
|                  |     |     | 3      | 0.5999 | 0.0793 | 0.1357 | 0.5886 | 0.0668 | 0.1127 | 0.8845 | 0.0236 | 0.0239 |

Table S4: The ACLs (1st column) and CPs (2nd column) of 95% asymptotic/credible intervals of  $\beta$ .

| $n$                 | $m$ | Scheme | ACI-NA<br>ACI-NL |       | BCI<br>HPD |       |        | ACI-NA<br>ACI-NL |        | BCI<br>HPD |        |       |        |       |
|---------------------|-----|--------|------------------|-------|------------|-------|--------|------------------|--------|------------|--------|-------|--------|-------|
| Prior $\rightarrow$ |     |        | 1                |       |            | 2     |        | 1                |        |            | 2      |       |        |       |
|                     |     |        | Set-1            |       |            |       |        |                  | Set-2  |            |        |       |        |       |
| 40                  | 20  | 1      | 0.2372           | 0.925 | 0.1744     | 0.943 | 0.1557 | 0.962            | 0.7480 | 0.847      | 0.4257 | 0.905 | 0.3289 | 0.920 |
|                     |     |        | 0.2398           | 0.924 | 0.1703     | 0.945 | 0.1453 | 0.964            | 0.7586 | 0.842      | 0.4216 | 0.907 | 0.3237 | 0.921 |
|                     |     | 2      | 0.2351           | 0.926 | 0.1721     | 0.944 | 0.1497 | 0.963            | 0.7460 | 0.851      | 0.4204 | 0.906 | 0.3236 | 0.921 |
|                     |     |        | 0.2377           | 0.926 | 0.1691     | 0.946 | 0.1479 | 0.965            | 0.7565 | 0.845      | 0.4162 | 0.909 | 0.3187 | 0.925 |
|                     |     | 3      | 0.2259           | 0.931 | 0.1634     | 0.948 | 0.1456 | 0.967            | 0.7310 | 0.855      | 0.4204 | 0.910 | 0.3215 | 0.922 |
|                     |     |        | 0.2283           | 0.929 | 0.1619     | 0.949 | 0.1441 | 0.968            | 0.7411 | 0.852      | 0.4158 | 0.912 | 0.3171 | 0.925 |
| 40                  | 30  | 1      | 0.2295           | 0.928 | 0.1615     | 0.950 | 0.1371 | 0.971            | 0.7116 | 0.875      | 0.4030 | 0.919 | 0.2500 | 0.933 |
|                     |     |        | 0.2332           | 0.926 | 0.1492     | 0.954 | 0.1275 | 0.973            | 0.7260 | 0.872      | 0.3757 | 0.923 | 0.2456 | 0.935 |
|                     |     | 2      | 0.2259           | 0.931 | 0.1629     | 0.949 | 0.1489 | 0.969            | 0.7071 | 0.882      | 0.3991 | 0.918 | 0.2500 | 0.935 |
|                     |     |        | 0.2294           | 0.929 | 0.1575     | 0.952 | 0.1387 | 0.971            | 0.7212 | 0.880      | 0.3727 | 0.921 | 0.2446 | 0.936 |
|                     |     | 3      | 0.2148           | 0.934 | 0.1580     | 0.951 | 0.1096 | 0.975            | 0.6895 | 0.887      | 0.3939 | 0.920 | 0.2525 | 0.932 |
|                     |     |        | 0.2179           | 0.933 | 0.1529     | 0.953 | 0.1053 | 0.976            | 0.7027 | 0.883      | 0.3663 | 0.922 | 0.2483 | 0.934 |
| 80                  | 40  | 1      | 0.1669           | 0.942 | 0.1411     | 0.959 | 0.1033 | 0.976            | 0.5235 | 0.905      | 0.3530 | 0.927 | 0.1384 | 0.946 |
|                     |     |        | 0.1678           | 0.941 | 0.1311     | 0.961 | 0.0995 | 0.978            | 0.5272 | 0.903      | 0.3376 | 0.930 | 0.1349 | 0.949 |
|                     |     | 2      | 0.1654           | 0.943 | 0.1361     | 0.960 | 0.1085 | 0.976            | 0.5220 | 0.907      | 0.3523 | 0.927 | 0.1400 | 0.946 |
|                     |     |        | 0.1663           | 0.942 | 0.1296     | 0.964 | 0.1043 | 0.977            | 0.5257 | 0.906      | 0.3391 | 0.929 | 0.1365 | 0.948 |
|                     |     | 3      | 0.1586           | 0.946 | 0.1339     | 0.962 | 0.1004 | 0.979            | 0.5107 | 0.912      | 0.3470 | 0.933 | 0.1404 | 0.952 |
|                     |     |        | 0.1595           | 0.945 | 0.1260     | 0.965 | 0.0988 | 0.980            | 0.5142 | 0.914      | 0.3319 | 0.936 | 0.1368 | 0.955 |
|                     | 60  | 1      | 0.1612           | 0.944 | 0.1291     | 0.964 | 0.0997 | 0.980            | 0.4971 | 0.920      | 0.3291 | 0.940 | 0.1221 | 0.959 |
|                     |     |        | 0.1626           | 0.944 | 0.1223     | 0.966 | 0.0986 | 0.981            | 0.5021 | 0.917      | 0.3246 | 0.942 | 0.1180 | 0.961 |
|                     |     | 2      | 0.1587           | 0.946 | 0.1259     | 0.965 | 0.1004 | 0.979            | 0.4939 | 0.921      | 0.3375 | 0.941 | 0.1221 | 0.960 |
|                     |     |        | 0.1599           | 0.945 | 0.1187     | 0.969 | 0.0988 | 0.981            | 0.4988 | 0.920      | 0.3324 | 0.943 | 0.1180 | 0.962 |
|                     |     | 3      | 0.1505           | 0.948 | 0.1214     | 0.967 | 0.0992 | 0.980            | 0.4804 | 0.924      | 0.3311 | 0.943 | 0.1229 | 0.962 |
|                     |     |        | 0.1516           | 0.948 | 0.1145     | 0.970 | 0.0953 | 0.982            | 0.4850 | 0.922      | 0.3242 | 0.946 | 0.1189 | 0.965 |

Table S5: The ACLs (1st column) and CPs (2nd column) of 95% asymptotic/credible intervals of  $\delta$ .

| $n$                 | $m$ | Scheme | ACI-NA<br>ACI-NL |       | BCI<br>HPD |       |        |       | ACI-NA<br>ACI-NL |       | BCI<br>HPD |       |        |       |
|---------------------|-----|--------|------------------|-------|------------|-------|--------|-------|------------------|-------|------------|-------|--------|-------|
| Prior $\rightarrow$ |     |        |                  |       | 1          |       | 2      |       |                  |       | 1          |       | 2      |       |
|                     |     |        | Set-1            |       |            |       |        |       | Set-2            |       |            |       |        |       |
| 40                  | 20  | 1      | 1.7446           | 0.842 | 0.5288     | 0.937 | 0.1772 | 0.968 | 3.1385           | 0.827 | 0.5632     | 0.930 | 0.1939 | 0.961 |
|                     |     |        | 1.8556           | 0.835 | 0.5185     | 0.940 | 0.1766 | 0.969 | 3.3452           | 0.819 | 0.5523     | 0.932 | 0.1912 | 0.962 |
|                     |     |        | 1.7288           | 0.846 | 0.5270     | 0.938 | 0.1761 | 0.970 | 3.1260           | 0.860 | 0.5526     | 0.930 | 0.1923 | 0.963 |
|                     |     | 2      | 1.8381           | 0.838 | 0.5103     | 0.943 | 0.1754 | 0.971 | 3.3310           | 0.825 | 0.5418     | 0.935 | 0.1890 | 0.965 |
|                     |     |        | 1.8625           | 0.831 | 0.5443     | 0.931 | 0.1776 | 0.968 | 3.1940           | 0.816 | 0.5663     | 0.929 | 0.1967 | 0.961 |
|                     |     |        | 1.9848           | 0.823 | 0.5304     | 0.933 | 0.1760 | 0.969 | 3.4046           | 0.807 | 0.5517     | 0.931 | 0.1954 | 0.961 |
|                     | 30  | 1      | 1.3566           | 0.871 | 0.5245     | 0.939 | 0.1668 | 0.973 | 2.5070           | 0.852 | 0.5606     | 0.933 | 0.1876 | 0.965 |
|                     |     |        | 1.4126           | 0.863 | 0.5122     | 0.943 | 0.1628 | 0.975 | 2.6149           | 0.843 | 0.5468     | 0.937 | 0.1869 | 0.966 |
|                     |     |        | 1.3529           | 0.872 | 0.5211     | 0.940 | 0.1663 | 0.974 | 2.5054           | 0.854 | 0.5492     | 0.936 | 0.1874 | 0.965 |
|                     |     | 2      | 1.4086           | 0.866 | 0.5092     | 0.945 | 0.1623 | 0.976 | 2.6131           | 0.847 | 0.5346     | 0.940 | 0.1852 | 0.967 |
|                     |     |        | 1.4331           | 0.857 | 0.5233     | 0.940 | 0.1671 | 0.973 | 2.5658           | 0.839 | 0.5452     | 0.937 | 0.1913 | 0.962 |
|                     |     |        | 1.4940           | 0.846 | 0.5053     | 0.946 | 0.1628 | 0.974 | 2.6772           | 0.828 | 0.5377     | 0.939 | 0.1872 | 0.965 |
| 80                  | 40  | 1      | 1.1836           | 0.889 | 0.4450     | 0.954 | 0.1052 | 0.983 | 2.1484           | 0.868 | 0.5286     | 0.948 | 0.1172 | 0.980 |
|                     |     |        | 1.2205           | 0.882 | 0.4269     | 0.958 | 0.1040 | 0.984 | 2.2180           | 0.861 | 0.5256     | 0.952 | 0.1169 | 0.981 |
|                     |     |        | 1.1719           | 0.893 | 0.4556     | 0.952 | 0.1051 | 0.984 | 2.1400           | 0.870 | 0.5449     | 0.943 | 0.1171 | 0.981 |
|                     |     | 2      | 1.2082           | 0.885 | 0.4366     | 0.956 | 0.1039 | 0.985 | 2.2090           | 0.863 | 0.5311     | 0.950 | 0.1167 | 0.982 |
|                     |     |        | 1.2756           | 0.877 | 0.4589     | 0.951 | 0.1053 | 0.983 | 2.2034           | 0.856 | 0.5302     | 0.951 | 0.1171 | 0.980 |
|                     |     |        | 1.3169           | 0.870 | 0.4393     | 0.955 | 0.1043 | 0.985 | 2.2753           | 0.850 | 0.5259     | 0.952 | 0.1170 | 0.980 |
|                     | 60  | 1      | 0.9237           | 0.907 | 0.4371     | 0.959 | 0.1047 | 0.985 | 1.7188           | 0.885 | 0.5228     | 0.953 | 0.1065 | 0.984 |
|                     |     |        | 0.9425           | 0.904 | 0.4202     | 0.964 | 0.1037 | 0.986 | 1.7554           | 0.881 | 0.5156     | 0.956 | 0.1060 | 0.985 |
|                     |     |        | 0.9211           | 0.908 | 0.4365     | 0.960 | 0.1010 | 0.988 | 1.7177           | 0.886 | 0.5116     | 0.958 | 0.1063 | 0.985 |
|                     |     | 2      | 0.9398           | 0.905 | 0.4185     | 0.967 | 0.1000 | 0.988 | 1.7542           | 0.882 | 0.5080     | 0.961 | 0.1058 | 0.986 |
|                     |     |        | 0.9804           | 0.903 | 0.4429     | 0.957 | 0.1048 | 0.985 | 1.7673           | 0.880 | 0.5202     | 0.954 | 0.1067 | 0.984 |
|                     |     |        | 1.0010           | 0.902 | 0.4257     | 0.966 | 0.1037 | 0.986 | 1.8053           | 0.879 | 0.5199     | 0.956 | 0.1059 | 0.985 |

Table S6: The ACLs (1st column) and CPs (2nd column) of 95% asymptotic/credible intervals of  $R_1(t)$ .

| $n$                 | $m$ | Scheme | ACI-NA<br>ACI-NL |       | BCI<br>HPD |       |        |       | ACI-NA<br>ACI-NL |       | BCI<br>HPD |       |        |       |
|---------------------|-----|--------|------------------|-------|------------|-------|--------|-------|------------------|-------|------------|-------|--------|-------|
| Prior $\rightarrow$ |     |        |                  |       | 1          |       | 2      |       |                  |       | 1          |       | 2      |       |
|                     |     |        | Set-1            |       |            |       |        |       | Set-2            |       |            |       |        |       |
| 40                  | 20  | 1      | 0.0878           | 0.948 | 0.0610     | 0.967 | 0.0529 | 0.974 | 0.2394           | 0.928 | 0.1361     | 0.948 | 0.0955 | 0.956 |
|                     |     |        | 0.0876           | 0.948 | 0.0624     | 0.966 | 0.0530 | 0.974 | 0.2381           | 0.929 | 0.1372     | 0.947 | 0.0956 | 0.956 |
|                     |     |        | 0.0834           | 0.952 | 0.0581     | 0.970 | 0.0485 | 0.977 | 0.2324           | 0.933 | 0.1341     | 0.951 | 0.0950 | 0.959 |
|                     |     | 2      | 0.0831           | 0.953 | 0.0592     | 0.969 | 0.0500 | 0.976 | 0.2312           | 0.934 | 0.1351     | 0.950 | 0.0953 | 0.958 |
|                     |     |        | 0.0878           | 0.948 | 0.0611     | 0.967 | 0.0513 | 0.975 | 0.2377           | 0.929 | 0.1342     | 0.949 | 0.0970 | 0.957 |
|                     |     |        | 0.0871           | 0.950 | 0.0620     | 0.966 | 0.0515 | 0.975 | 0.2364           | 0.930 | 0.1354     | 0.948 | 0.0973 | 0.957 |
|                     | 30  | 1      | 0.0811           | 0.961 | 0.0494     | 0.976 | 0.0462 | 0.980 | 0.2246           | 0.937 | 0.1195     | 0.955 | 0.0715 | 0.965 |
|                     |     |        | 0.0810           | 0.961 | 0.0515     | 0.975 | 0.0479 | 0.979 | 0.2231           | 0.938 | 0.1226     | 0.953 | 0.0719 | 0.964 |
|                     |     |        | 0.0758           | 0.963 | 0.0513     | 0.975 | 0.0377 | 0.986 | 0.2210           | 0.939 | 0.1160     | 0.954 | 0.0713 | 0.970 |
|                     |     | 2      | 0.0755           | 0.964 | 0.0531     | 0.972 | 0.0380 | 0.985 | 0.2197           | 0.941 | 0.1201     | 0.952 | 0.0716 | 0.970 |
|                     |     |        | 0.0801           | 0.962 | 0.0531     | 0.972 | 0.0427 | 0.983 | 0.2239           | 0.938 | 0.1186     | 0.953 | 0.0724 | 0.968 |
|                     |     |        | 0.0799           | 0.962 | 0.0546     | 0.969 | 0.0440 | 0.982 | 0.2225           | 0.939 | 0.1216     | 0.952 | 0.0727 | 0.967 |
| 80                  | 40  | 1      | 0.0619           | 0.967 | 0.0459     | 0.979 | 0.0374 | 0.986 | 0.1682           | 0.945 | 0.1006     | 0.959 | 0.0380 | 0.978 |
|                     |     |        | 0.0615           | 0.968 | 0.0482     | 0.977 | 0.0377 | 0.986 | 0.1677           | 0.946 | 0.1029     | 0.958 | 0.0383 | 0.978 |
|                     |     |        | 0.0586           | 0.970 | 0.0445     | 0.980 | 0.0359 | 0.989 | 0.1630           | 0.949 | 0.0995     | 0.960 | 0.0375 | 0.981 |
|                     |     | 2      | 0.0583           | 0.970 | 0.0463     | 0.978 | 0.0363 | 0.988 | 0.1626           | 0.949 | 0.1021     | 0.958 | 0.0378 | 0.980 |
|                     |     |        | 0.0613           | 0.968 | 0.0460     | 0.979 | 0.0361 | 0.988 | 0.1669           | 0.947 | 0.1012     | 0.959 | 0.0381 | 0.978 |
|                     |     |        | 0.0610           | 0.969 | 0.0477     | 0.978 | 0.0365 | 0.987 | 0.1664           | 0.947 | 0.1043     | 0.956 | 0.0384 | 0.977 |
|                     | 60  | 1      | 0.0570           | 0.973 | 0.0414     | 0.984 | 0.0355 | 0.988 | 0.1581           | 0.951 | 0.0979     | 0.961 | 0.0322 | 0.983 |
|                     |     |        | 0.0566           | 0.974 | 0.0427     | 0.982 | 0.0360 | 0.987 | 0.1576           | 0.952 | 0.1000     | 0.960 | 0.0326 | 0.981 |
|                     |     |        | 0.0530           | 0.977 | 0.0388     | 0.986 | 0.0331 | 0.990 | 0.1555           | 0.955 | 0.0972     | 0.963 | 0.0321 | 0.983 |
|                     |     | 2      | 0.0528           | 0.976 | 0.0401     | 0.985 | 0.0337 | 0.989 | 0.1551           | 0.955 | 0.0992     | 0.962 | 0.0324 | 0.983 |
|                     |     |        | 0.0563           | 0.974 | 0.0400     | 0.985 | 0.0357 | 0.989 | 0.1576           | 0.952 | 0.0980     | 0.963 | 0.0325 | 0.983 |
|                     |     |        | 0.0561           | 0.975 | 0.0416     | 0.984 | 0.0362 | 0.987 | 0.1572           | 0.952 | 0.1005     | 0.961 | 0.0329 | 0.981 |
